# Supplementary material for: Why Did Ozone Concentrations Increase During Shanghai’s Static Management? A Statistical and Radical Chemistry Perspective
Source: Copernicus journal article supplement (doi:10.5194/egusphere-2023-2142), 2023-12-15
Supplement: Supplementary file 1 [file egusphere-2023-2142-supplement.pdf]

1 *Supplement of*

2 **Why Did Ozone Rise During Shanghai's Static Management? A**  
3 **Statistical and Radical Chemistry Perspective**

4 Jian Zhu<sup>1</sup>, Shanshan Wang<sup>1,2</sup>, Chuanqi Gu<sup>1</sup>, Zhiwen Jiang<sup>1</sup>, Sanbao Zhang<sup>1</sup>, Ruibin Xue<sup>1</sup>, Yuhao Yan<sup>1</sup>, Bin  
5 Zhou<sup>1,2,3</sup>

6 <sup>1</sup>Shanghai Key Laboratory of Atmospheric Particle Pollution and Prevention (LAP<sup>3</sup>), Department of Environmental Science and  
7 Engineering, Fudan University, Shanghai, 200433, China.

8 <sup>2</sup>Institute of Eco-Chongming (IEC), Shanghai, 202162, China.

9 <sup>3</sup>Institute of Atmospheric Sciences, Fudan University, Shanghai, 200433, China.

10 *Corresponding to:* Bin Zhou ([binzhou@fudan.edu.cn](mailto:binzhou@fudan.edu.cn)) and Shanshan Wang ([shanshanwang@fudan.edu.cn](mailto:shanshanwang@fudan.edu.cn))

11

12 **Text S1 meteorological conditions.**

13 We evaluated whether there were significant changes in ground-level airflows in Shanghai during the static  
14 management period compared to the same periods in 2020 and 2021. An analysis of the frequency distribution of  
15 wind speed and wind direction (see Figure S7a-S7f) during the lockdown period shows that wind speeds were  
16 primarily distributed in the range of 2-4 m s<sup>-1</sup>, with the predominant wind direction between 0-180° (with 0° as true  
17 north and counting clockwise). Compared to the same periods in 2020 and 2021, during the 2022 lockdown period,  
18 there was an increase in the frequency of northerly winds and a decrease in the frequency of westerly winds. This  
19 indicates that Shanghai was upwind of other cities in the Yangtze River Delta region for most of the time during the  
20 static management period in 2022. From the mean diurnal profiles of wind speed and wind direction, it can be  
21 observed that during the lockdown period, the predominant wind direction throughout the day was between 90-150°,  
22 and higher wind speeds typically occurred in the afternoon, corresponding to a wind direction of around 100°.

23 From the rose diagrams of ozone and its precursors NO<sub>2</sub> and VOCs (see Figure S8), during the 2022 lockdown  
24 period, the predominant winds during high ozone levels were southerly winds with higher wind speeds and westerly  
25 winds with lower wind speeds. When NO<sub>2</sub> concentrations were high, wind speeds were generally lower, and the  
26 predominant wind direction during periods of high VOCs concentrations was southwest to south. Comparing the  
27 same period in 2020 and 2021, it is obvious that the transmission contribution of ozone and its precursors from other  
28 cities in the Yangtze River Delta in 2022 was limited.

29 We also analyzed the percentage change in meteorological conditions in Shanghai and its surrounding areas during  
30 the 2022 lockdown period compared to the same periods in 2020 and 2021 as shown in Figure S9 and Figure S10.  
31 The results indicate that in 2022, the 2-m temperature and relative humidity in the Shanghai area showed a slight  
32 decrease compared to 2020 and 2021, with the changes being relatively small. surface net solar radiation in 2022  
33 decreased compared to 2020 but was slightly higher than in 2021, while total precipitation in 2022 was significantly  
34 higher than in 2020. During the static management period in Shanghai, the decrease in average temperature,  
35 weakening of solar radiation, and increased precipitation may have contributed to the reduction in O<sub>3</sub> production by  
36 slowing down chemical reaction rates. ERA5 reanalysis data also indicates that during the static management period,  
37 there were minimal variations in 2-meter temperature, relative humidity, surface net solar radiation, boundary layer  
38 height, and total cloud cover in the Shanghai area, whereas these parameters exhibited more significant changes in  
39 the surrounding regions. The above results indicate that the increase in O<sub>3</sub> concentration in Shanghai during the 2022  
40 static management period was not due to changes in meteorological conditions.

41

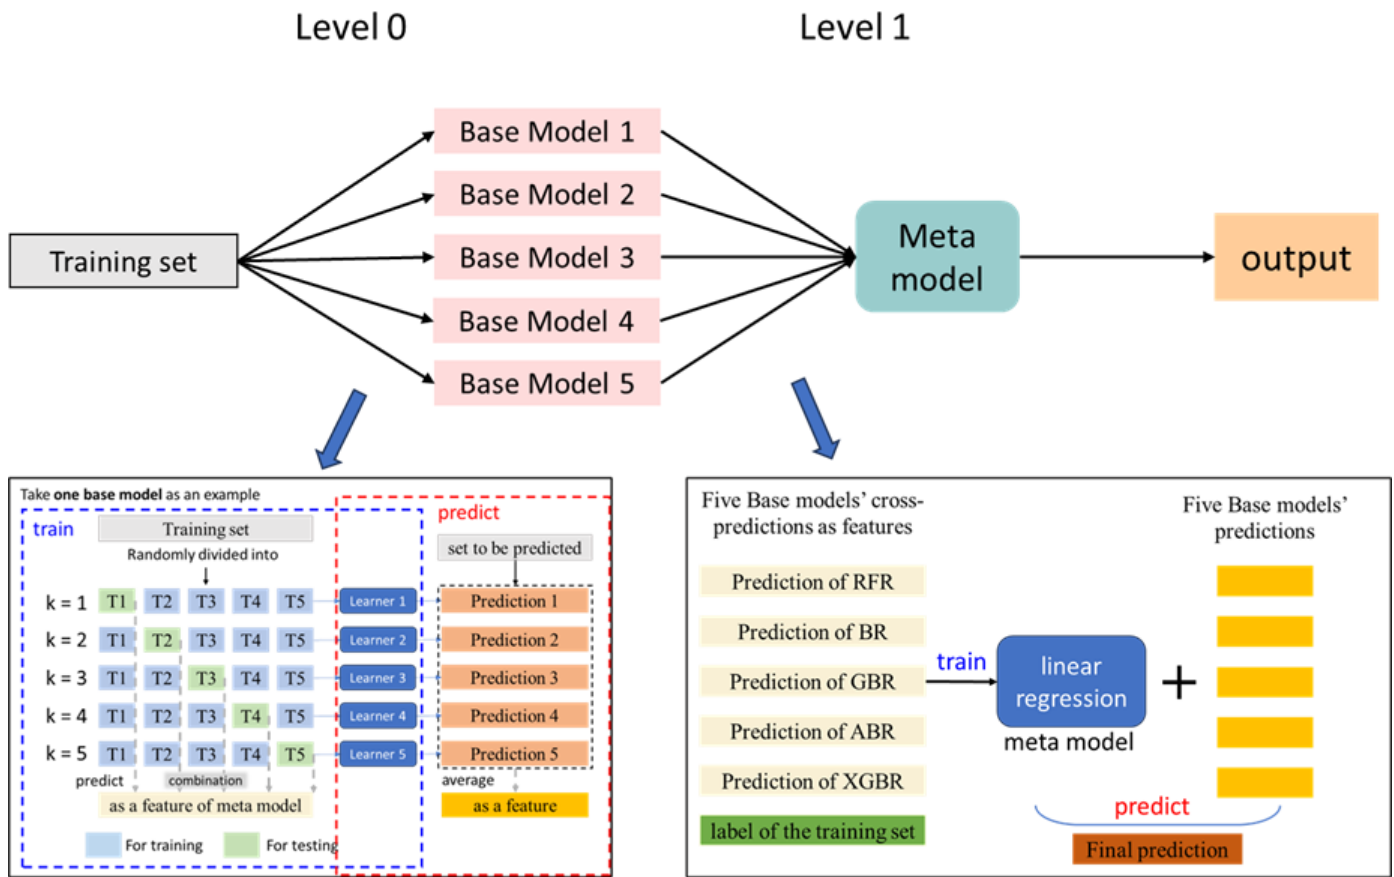

Figure S1. Framework of the stacking model.

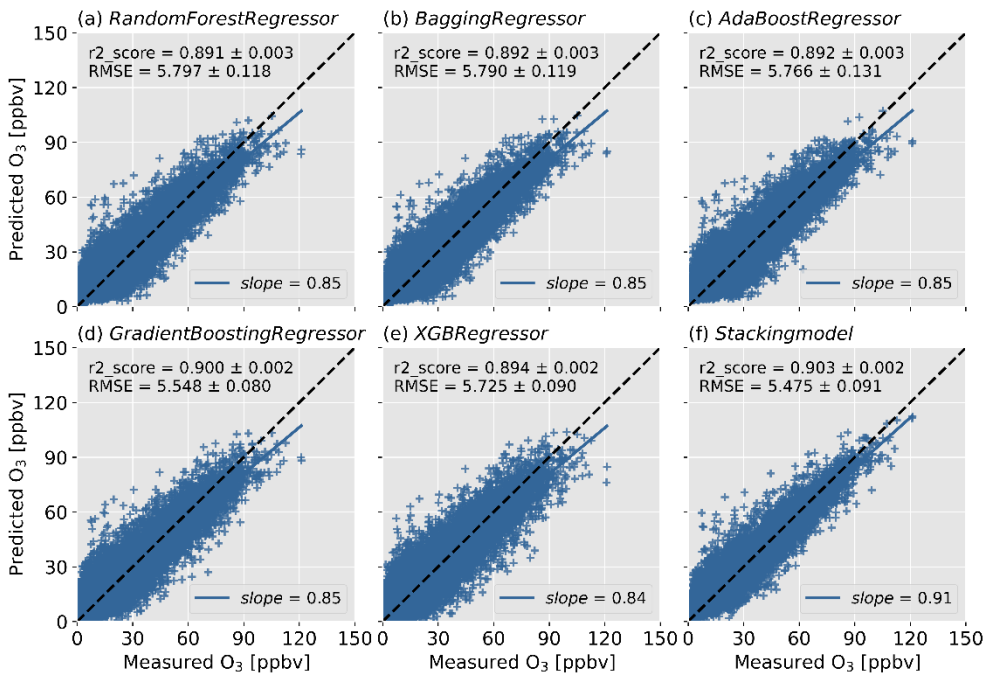

Figure S2. Performance comparisons of the stacking model and the five base models after 5-fold cross-validation with the indicators of the coefficient of determination ( $r_2$  score), root mean square error (RMSE), and slope between predicted and measured  $O_3$ .

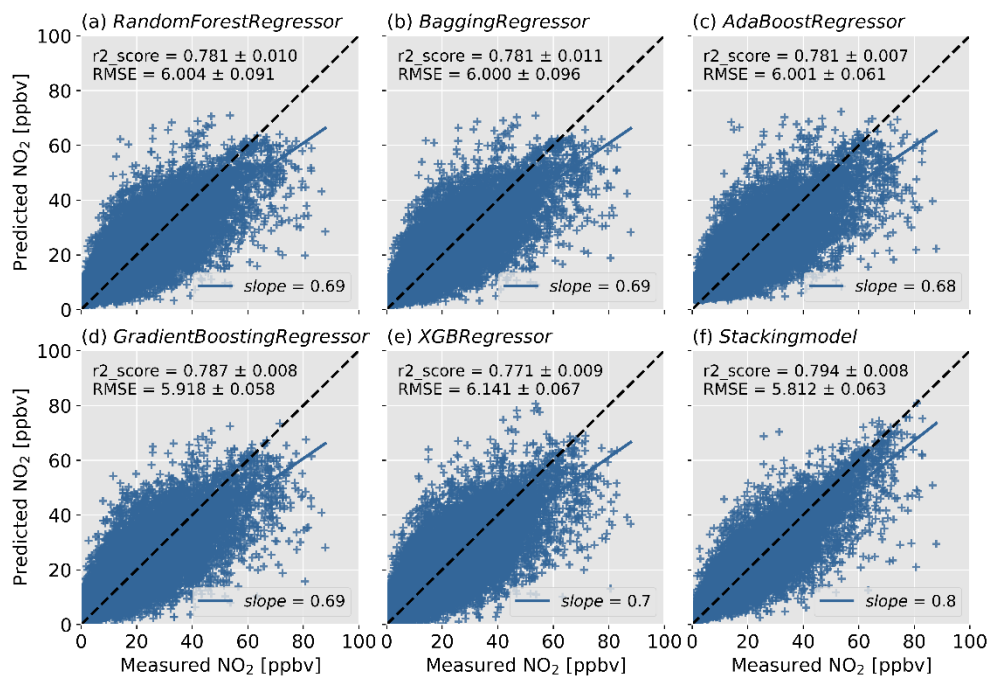

48

49

50

**Figure S3. Performance comparisons of the stacking model and the five base models after 5-fold cross-validation with the indicators of  $r_2\_score$ , RMSE, and slope between predicted and measured  $NO_2$ .**

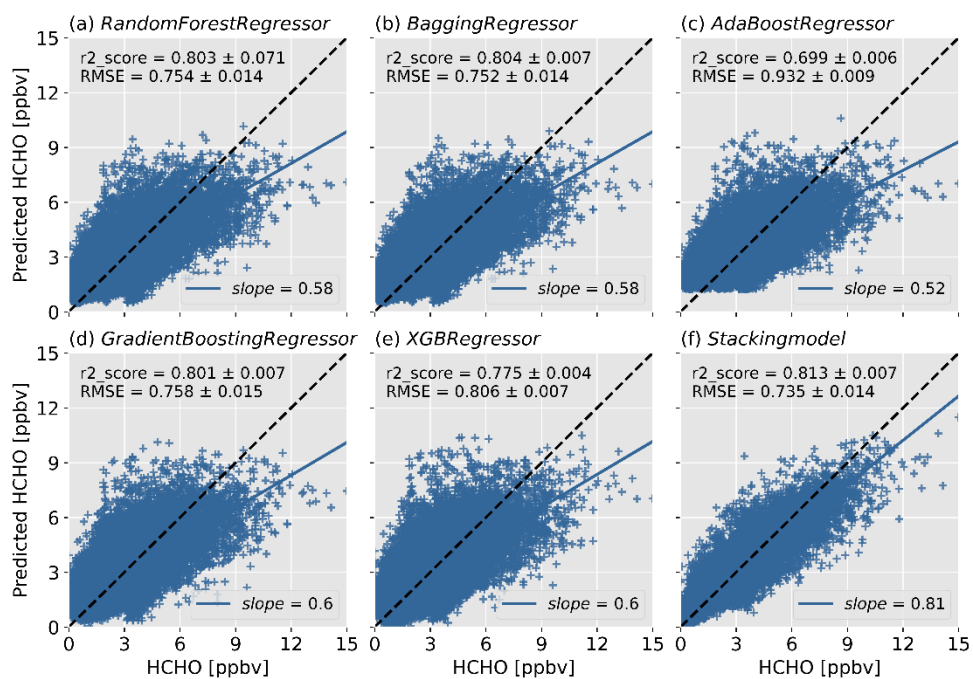

51

52

53

**Figure S4. Performance comparisons of the stacking model and the five base models after 5-fold cross-validation with the indicators of  $r_2\_score$ , RMSE, and slope between predicted and measured HCHO.**

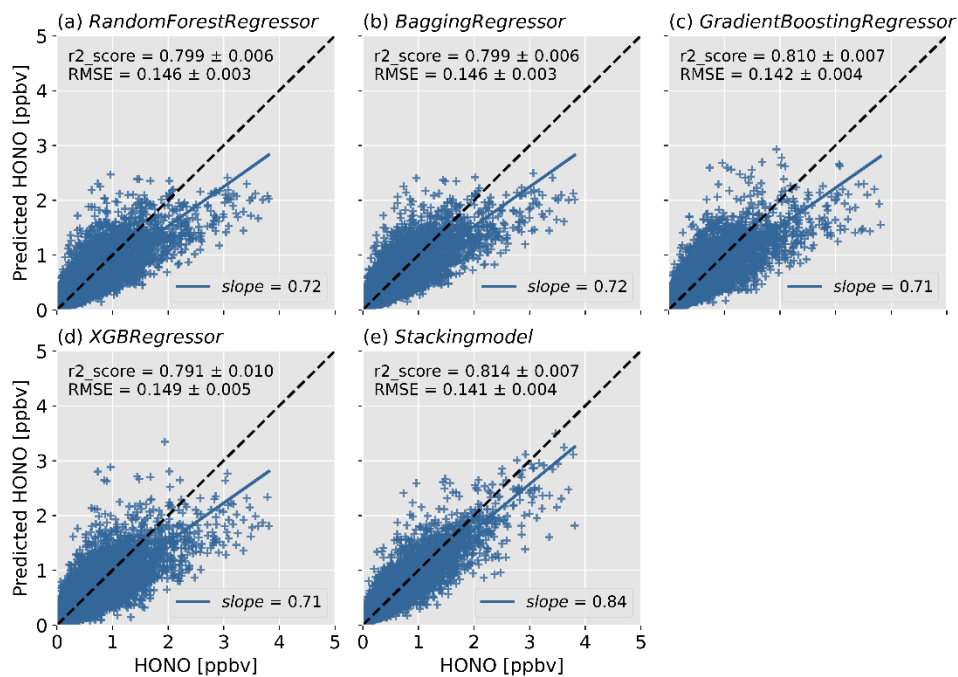

54

55

56

**Figure S5. Performance comparisons of the stacking model and the four base models after 5-fold cross-validation with the indicators of  $r_2\_score$ , RMSE, and slope between predicted and measured HONO.**

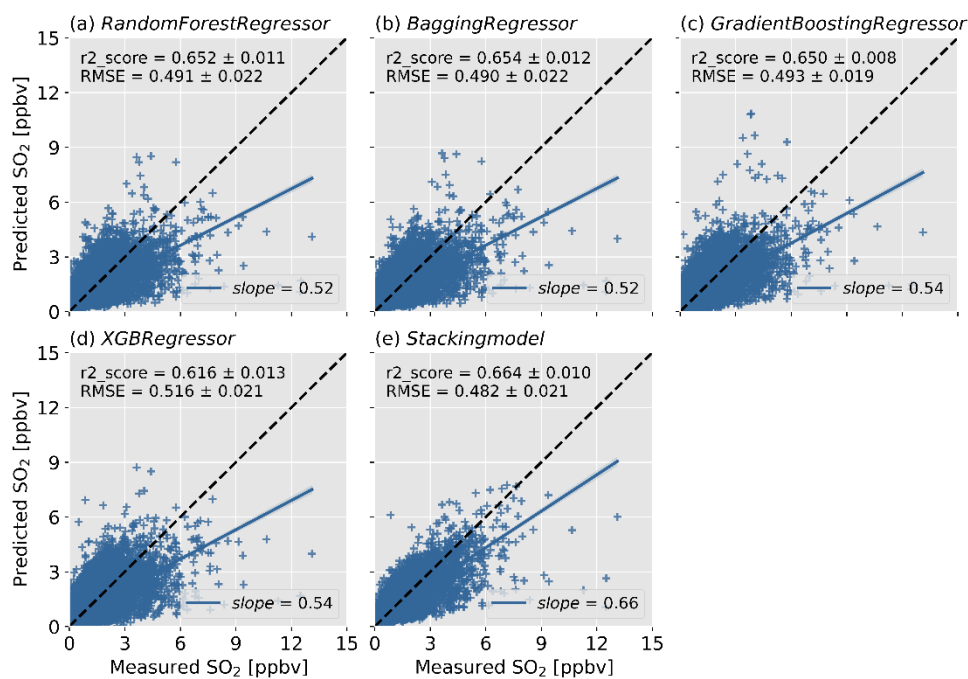

57

58

59

**Figure S6. Performance comparisons of the stacking model and the four base models after 5-fold cross-validation with the indicators of  $r_2\_score$ , RMSE, and slope between predicted and measured  $SO_2$ .**

60

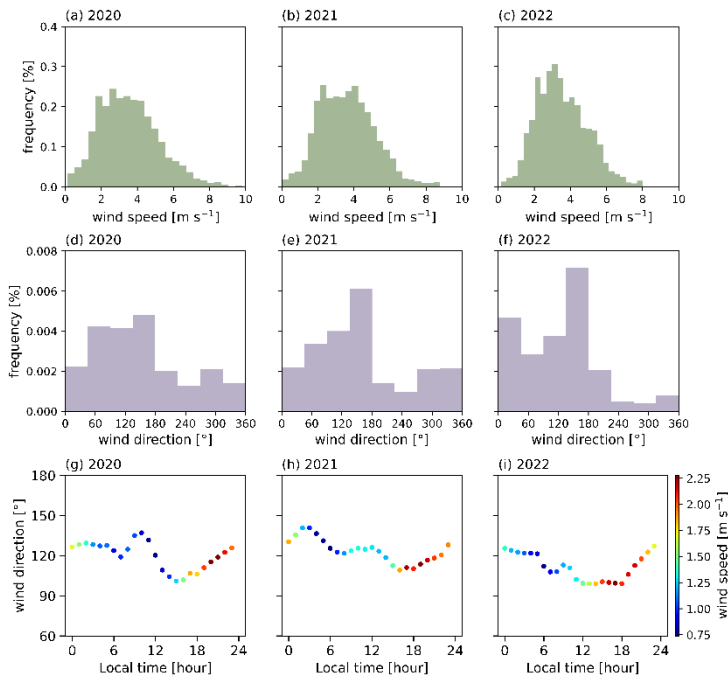

61  
62  
63  
Figure S7. The frequency (a-f) and the mean diurnal profiles (d, h, i) of wind speed and wind direction during the periods from April to May of 2020, 2021, and 2022.

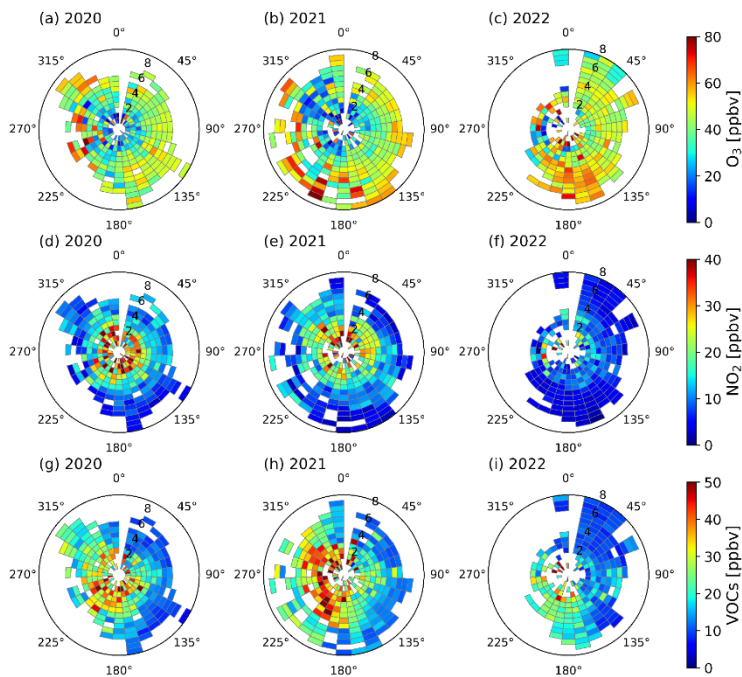

65  
66  
67  
Figure S8. The polar plots of O<sub>3</sub> (a, b, c), NO<sub>2</sub> (d, e, f) and VOCs (g, h, i) during the periods from April to May of 2020, 2021, and 2022.

68  
69  
70  
71  
72  
73

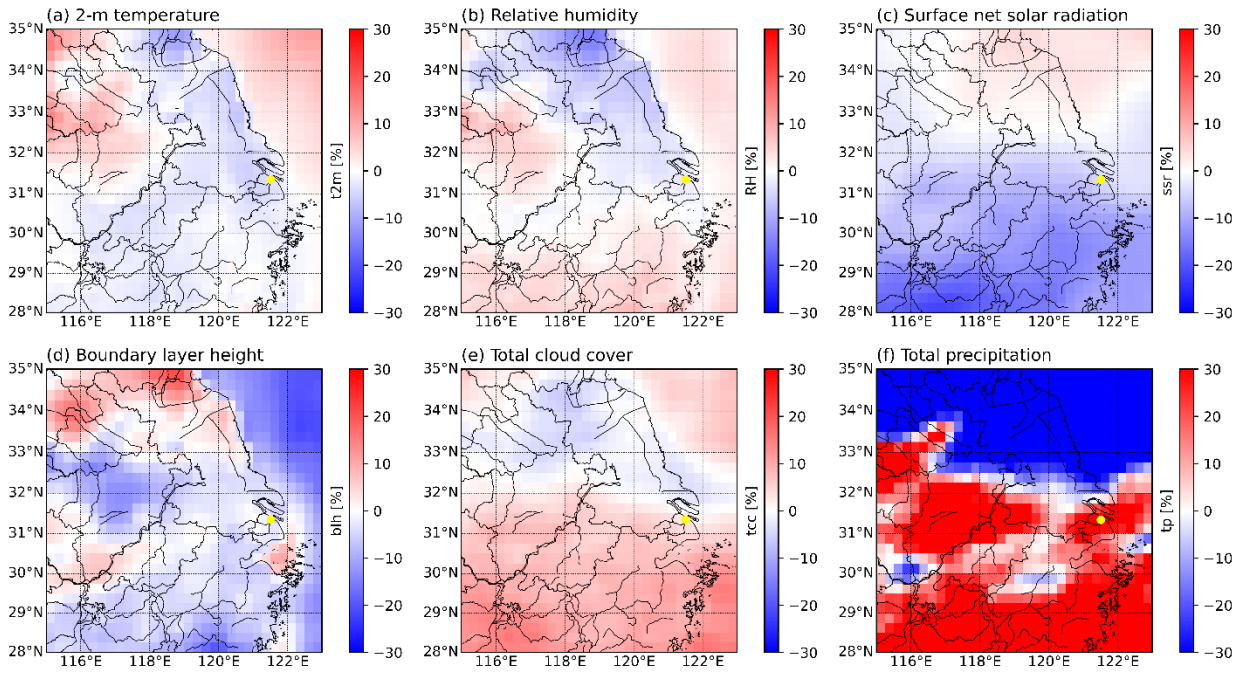

Figure S9. The percentage change in average meteorological parameters from the ERA5 data for Shanghai and its neighboring regions during the 2022 lockdown period compared to the same period in 2020. The 2-m temperature (t2m) (a), relative humidity calculated based on 2-m temperature and 2-m dewpoint temperature (b), surface net solar radiation (ssr) (c), boundary layer height (blh) (d), total cloud cover (tcc) (e), and total precipitation (tp) (f).

74  
75  
76  
77  
78

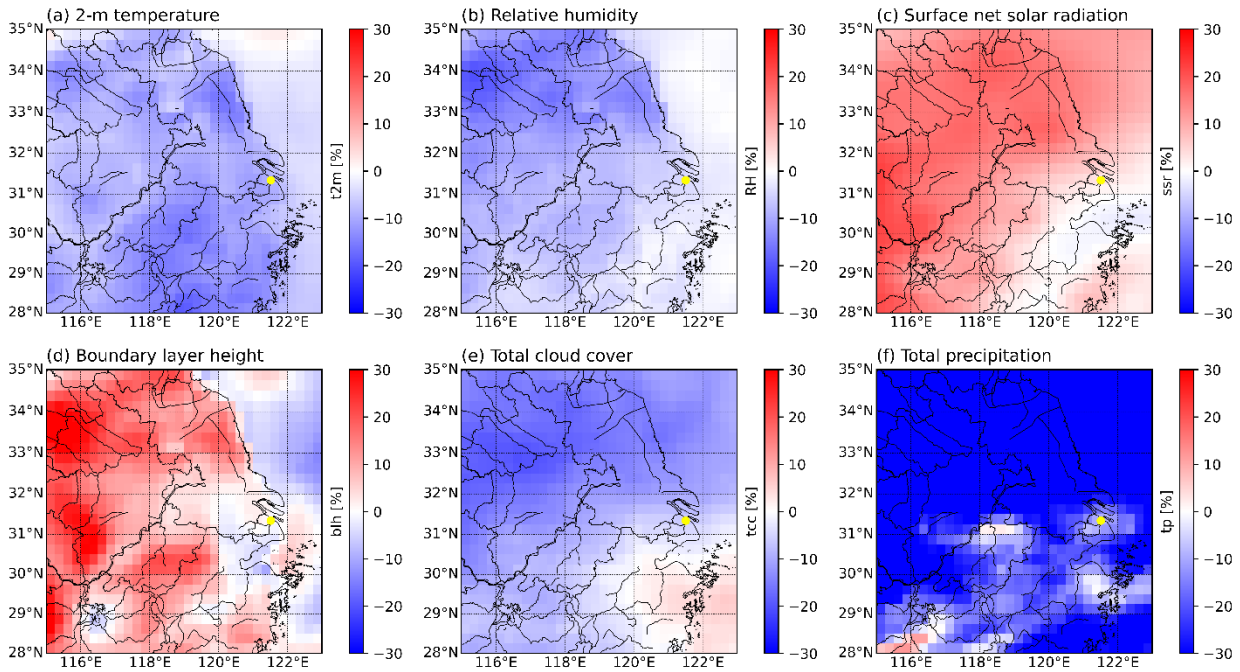

Figure S10. Same as Figure S9 but compared to the same period in 2021.



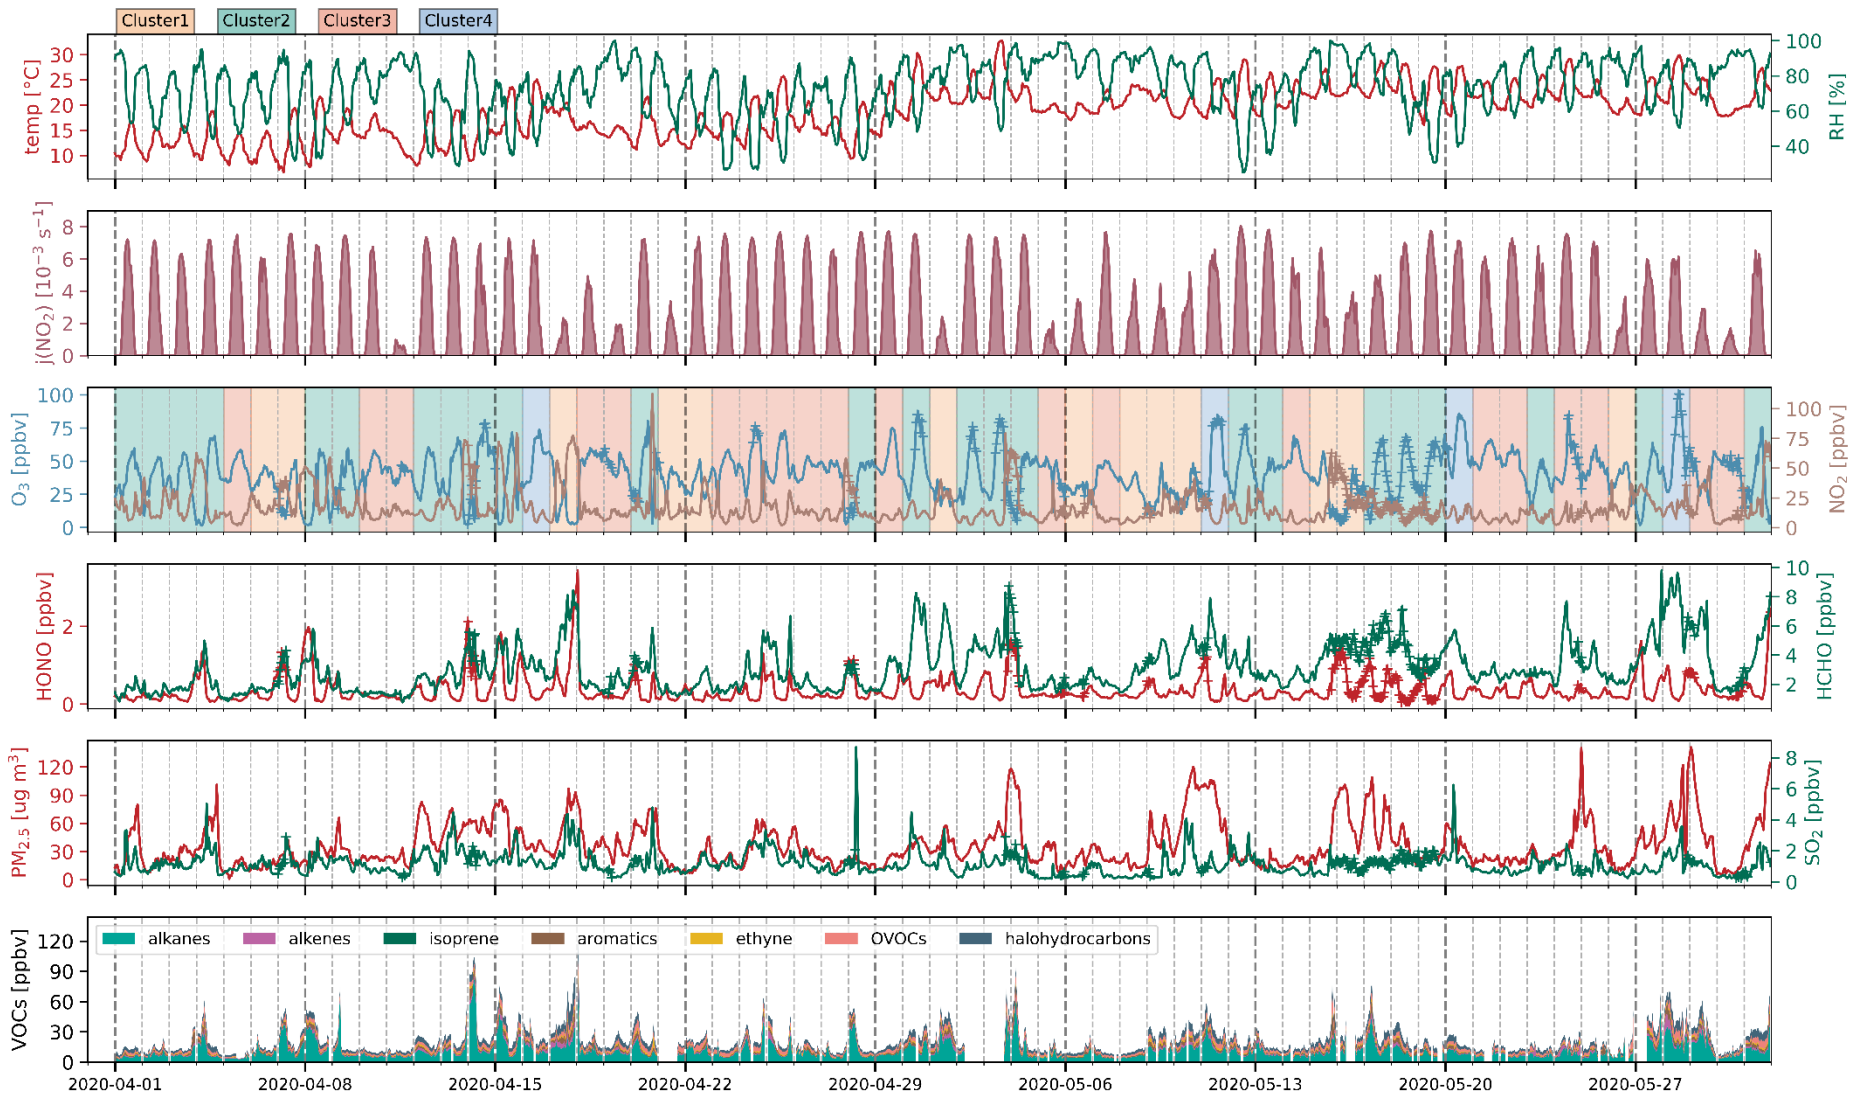

79

80

81

**Figure S11.** Time series of meteorological parameters (temp, RH,  $j(\text{NO}_2)$ ) and air pollutants ( $\text{O}_3$ ,  $\text{NO}_2$ , HONO, HCHO,  $\text{SO}_2$ ,  $\text{PM}_{2.5}$ , VOCs) from April to May 2020. The data with the "+" symbol represents the predictions made by machine learning and is used to fill in missing values in the observations.



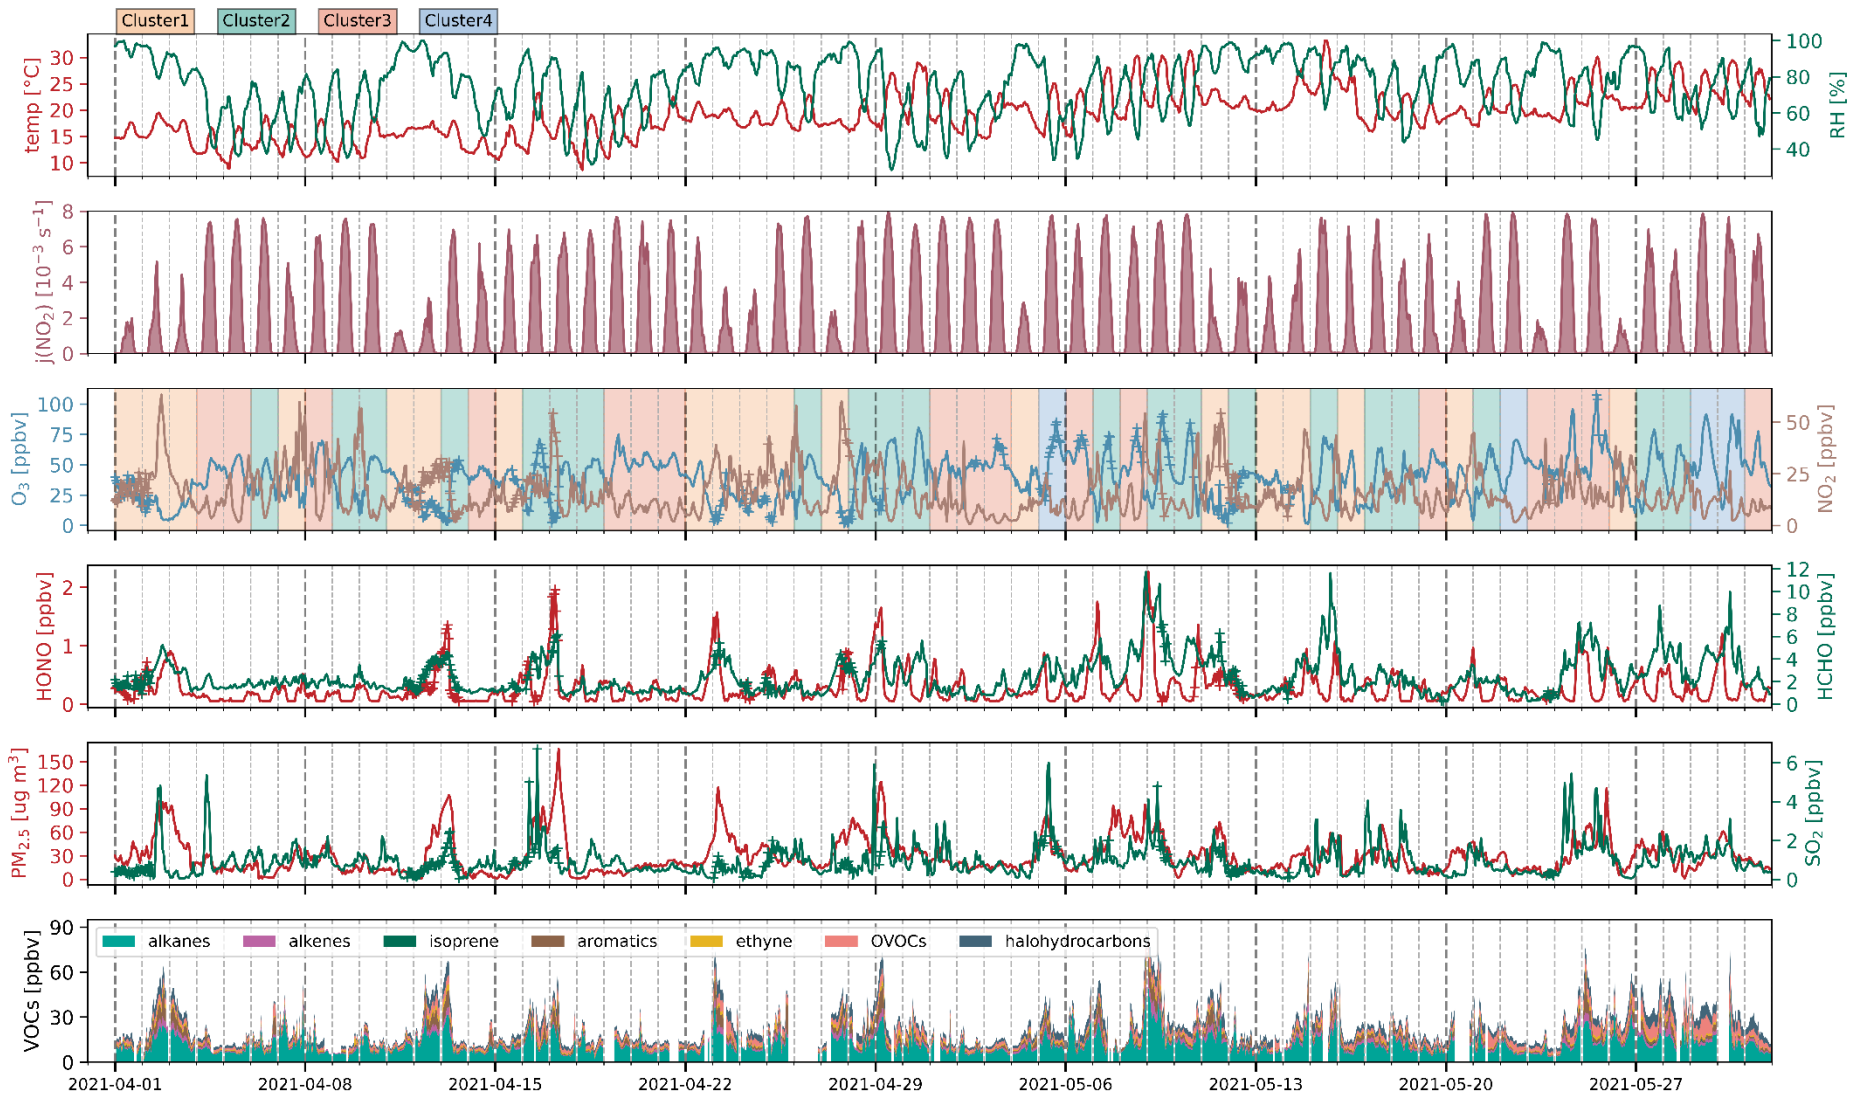

82

83

Figure S12. Same as Figure S11, but for the period between April and May 2021.

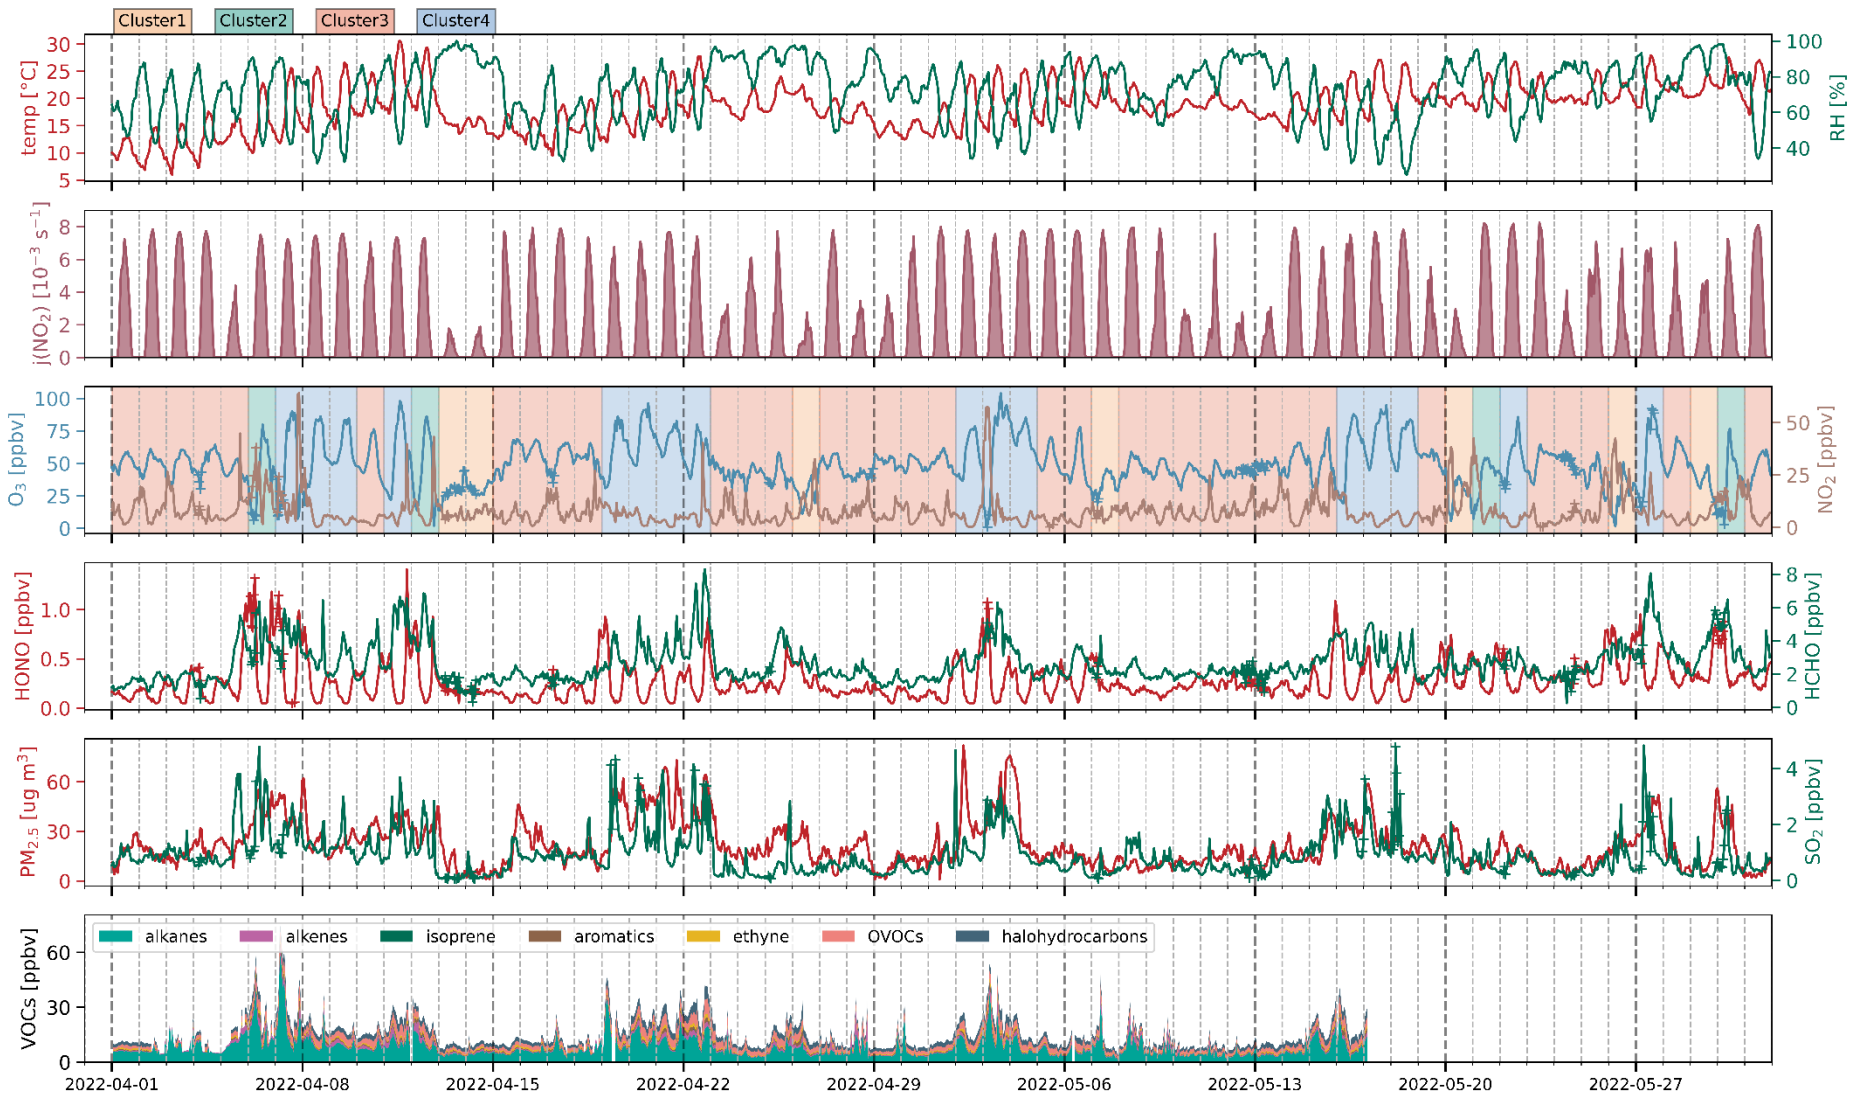

84  
 85 **Figure S13. Same as Figure S11, but for the period between April and May 2022.**

86

87 Table S1. The configuration of spectral fitting of O<sub>3</sub>, NO<sub>2</sub>, SO<sub>2</sub>, HONO and HCHO.

| Trace gas       | Fitting window (nm) | absorption cross sections                                                                                                                                                                                           | Polynomial degree | detection limits |
|-----------------|---------------------|---------------------------------------------------------------------------------------------------------------------------------------------------------------------------------------------------------------------|-------------------|------------------|
| O <sub>3</sub>  | 280.6-290.6         | O <sub>3</sub> (Voigt et al., 2001), SO <sub>2</sub> (Vandaele et al., 2009), HCHO (Meller and Moortgat, 2000), and NO <sub>2</sub> (Voight et al., 2002)                                                           | 5                 | 1.3 ppbv         |
| NO <sub>2</sub> | 365.3-380.4         | NO <sub>2</sub> (Voight et al., 2002), HONO (Stutz et al., 2000), HCHO (Meller and Moortgat, 2000), and solar spectrum (Kurucz, 1984)                                                                               | 5                 | 0.5 ppbv         |
| SO <sub>2</sub> | 295.3-307.9         | SO <sub>2</sub> (Vandaele et al., 2009), O <sub>3</sub> (Voigt et al., 2001), HCHO (Meller and Moortgat, 2000), NO <sub>2</sub> (Voight et al., 2002), and solar spectrum (Kurucz, 1984)                            | 5                 | 0.1 ppbv         |
| HONO            | 339.4-373.2         | HONO (Stutz et al., 2000), NO <sub>2</sub> (Voight et al., 2002), HCHO (Meller and Moortgat, 2000), and solar spectrum (Kurucz, 1984)                                                                               | 5                 | 0.1 ppbv         |
| HCHO            | 311.7-342.1         | HCHO (Meller and Moortgat, 2000), NO <sub>2</sub> (Voight et al., 2002), HONO (Stutz et al., 2000), O <sub>3</sub> (Voigt et al., 2001), SO <sub>2</sub> (Vandaele et al., 2009), and solar spectrum (Kurucz, 1984) | 5                 | 0.5 ppbv         |

88

89 Table S2. Summary of the mean concentration of measured VOCs during the periods from April to May of 2020, 2021, and 2022.

| Species                | Average concentration (mean ± std, unit: ppbv) |             |             |
|------------------------|------------------------------------------------|-------------|-------------|
|                        | 2020                                           | 2021        | 2022        |
| <b>alkanes</b>         |                                                |             |             |
| Ethane                 | 4.36 ± 3.73                                    | 4.30 ± 2.02 | 3.66 ± 2.57 |
| Propane                | 2.91 ± 2.91                                    | 2.96 ± 1.96 | 1.63 ± 1.28 |
| n-Butane               | 1.12 ± 1.04                                    | 1.23 ± 0.87 | 0.70 ± 0.67 |
| Isobutane              | 0.86 ± 0.96                                    | 1.00 ± 0.83 | 0.54 ± 0.53 |
| n-Pentane              | 0.46 ± 0.55                                    | 0.50 ± 0.44 | 0.32 ± 0.34 |
| Isopentane             | 0.82 ± 1.07                                    | 0.92 ± 0.99 | 0.66 ± 0.83 |
| Cyclopentane           | 0.04 ± 0.04                                    | 0.04 ± 0.07 | 0.03 ± 0.04 |
| n-Hexane               | 0.13 ± 0.16                                    | 0.14 ± 0.15 | 0.06 ± 0.06 |
| 2,2-Dimethylbutane     | 0.02 ± 0.03                                    | 0.03 ± 0.02 | 0.01 ± 0.01 |
| Cyclohexane            | 0.05 ± 0.07                                    | 0.05 ± 0.07 | 0.02 ± 0.02 |
| 2,3-Dimethylbutane     | 0.03 ± 0.03                                    | 0.05 ± 0.04 |             |
| 2-Methylpentane        | 0.15 ± 0.16                                    | 0.21 ± 0.19 | 0.09 ± 0.09 |
| 3-Methylpentane        | 0.12 ± 0.14                                    | 0.11 ± 0.12 | 0.04 ± 0.06 |
| Methylcyclopentane     | 0.04 ± 0.04                                    | 0.05 ± 0.04 | 0.02 ± 0.02 |
| n-Heptane              | 0.04 ± 0.04                                    | 0.05 ± 0.06 | 0.02 ± 0.03 |
| 2,3-Dimethylpentane    | 0.01 ± 0.01                                    | 0.02 ± 0.02 | 0.00 ± 0.01 |
| 2,4-Dimethylpentane    | 0.01 ± 0.01                                    | 0.01 ± 0.01 | 0.00 ± 0.00 |
| 3-Methylhexane         | 0.03 ± 0.03                                    | 0.04 ± 0.04 | 0.02 ± 0.02 |
| 2-Methylhexane         | 0.03 ± 0.02                                    | 0.03 ± 0.03 | 0.01 ± 0.01 |
| Methylcyclohexane      | 0.03 ± 0.04                                    | 0.04 ± 0.05 | 0.02 ± 0.02 |
| n-Octane               | 0.04 ± 0.05                                    | 0.03 ± 0.03 | 0.01 ± 0.01 |
| 2,2,4-trimethylpentane | 0.02 ± 0.02                                    | 0.02 ± 0.02 | 0.00 ± 0.01 |
| 2,3,4-trimethylpentane | 0.01 ± 0.01                                    | 0.01 ± 0.01 | 0.00 ± 0.01 |
| 2-Methylheptane        | 0.01 ± 0.01                                    | 0.01 ± 0.01 | 0.01 ± 0.01 |
| 3-Methylheptane        | 0.01 ± 0.01                                    | 0.01 ± 0.01 | 0.00 ± 0.01 |
| n-nonane               | 0.02 ± 0.02                                    | 0.02 ± 0.01 | 0.01 ± 0.01 |
| n-Decane               | 0.02 ± 0.01                                    | 0.02 ± 0.02 | 0.00 ± 0.01 |
| n-undecane             | 0.01 ± 0.01                                    | 0.02 ± 0.01 | 0.00 ± 0.01 |
| n-Dodecane             | 0.02 ± 0.01                                    | 0.02 ± 0.01 | 0.20 ± 0.36 |

| <b>alkenes</b>                |             |             |             |
|-------------------------------|-------------|-------------|-------------|
| Ethylene                      | 0.91 ± 1.14 | 1.13 ± 1.06 | 0.60 ± 0.61 |
| Propylene                     | 0.26 ± 0.50 | 0.30 ± 0.36 | 0.30 ± 0.83 |
| Isobutylene                   | 0.04 ± 0.05 | 0.06 ± 0.04 | 0.04 ± 0.03 |
| 1-butene                      | 0.06 ± 0.09 | 0.08 ± 0.08 | 0.06 ± 0.08 |
| cis-2-butene                  | 0.03 ± 0.04 | 0.13 ± 0.06 | 0.05 ± 0.03 |
| trans-2-butene                | 0.02 ± 0.05 | 0.05 ± 0.07 | 0.03 ± 0.05 |
| 1,3-Butadiene                 | 0.01 ± 0.04 | 0.02 ± 0.02 | 0.01 ± 0.04 |
| 1-pentene                     | 0.02 ± 0.02 | 0.04 ± 0.03 | 0.02 ± 0.01 |
| cis-2-pentene                 | 0.00 ± 0.01 | 0.00 ± 0.01 | 0.00 ± 0.00 |
| trans-2-pentene               | 0.00 ± 0.03 | 0.00 ± 0.01 | 0.00 ± 0.01 |
| 1-Hexene                      | 0.01 ± 0.01 | 0.00 ± 0.01 | 0.00 ± 0.00 |
| isoprene                      | 0.04 ± 0.09 | 0.06 ± 0.11 | 0.03 ± 0.06 |
| <b>Alkyne</b>                 |             |             |             |
| Acetylene                     | 0.96 ± 0.69 | 1.14 ± 0.78 | 0.75 ± 0.38 |
| <b>aromatic</b>               |             |             |             |
| Benzene                       | 0.34 ± 0.25 | 0.40 ± 0.38 | 0.24 ± 0.20 |
| Toluene                       | 0.57 ± 0.67 | 0.92 ± 1.56 | 0.18 ± 0.23 |
| Ethylbenzene                  | 0.20 ± 0.26 | 0.27 ± 0.39 | 0.05 ± 0.05 |
| o-Xylene                      | 0.16 ± 0.26 | 0.22 ± 0.34 | 0.04 ± 0.05 |
| m-Xylene                      | 0.28 ± 0.43 | 0.40 ± 0.58 | 0.06 ± 0.08 |
| p-xylene                      | 0.28 ± 0.43 | 0.40 ± 0.58 | 0.06 ± 0.08 |
| Styrene                       | 0.02 ± 0.03 | 0.03 ± 0.05 | 0.00 ± 0.01 |
| 1,2,3-Trimethylbenzene        | 0.01 ± 0.01 | 0.01 ± 0.01 | 0.00 ± 0.00 |
| 1,2,4-Trimethylbenzene        | 0.04 ± 0.05 | 0.04 ± 0.04 | 0.01 ± 0.01 |
| 1,3,5-Trimethylbenzene        | 0.01 ± 0.02 | 0.01 ± 0.02 | 0.00 ± 0.00 |
| o-Ethyl toluene               | 0.01 ± 0.01 | 0.02 ± 0.01 | 0.00 ± 0.01 |
| m-Ethyltoluene                | 0.02 ± 0.03 | 0.03 ± 0.03 | 0.01 ± 0.01 |
| p-Ethyltoluene                | 0.01 ± 0.02 | 0.02 ± 0.02 | 0.00 ± 0.00 |
| Isopropylbenzene              | 0.01 ± 0.01 | 0.01 ± 0.01 | 0.00 ± 0.01 |
| n-propylbenzene               | 0.01 ± 0.01 | 0.01 ± 0.01 | 0.00 ± 0.00 |
| m-diethylbenzene              | 0.00 ± 0.01 | 0.00 ± 0.00 | 0.00 ± 0.00 |
| p-diethylbenzene              | 0.01 ± 0.01 | 0.01 ± 0.01 | 0.00 ± 0.00 |
| <b>OVOCs</b>                  |             |             |             |
| Acetone                       | 1.81 ± 1.40 | 2.53 ± 2.08 | 1.94 ± 0.98 |
| Propionaldehyde               | 0.17 ± 0.10 | 0.13 ± 0.11 | 0.11 ± 0.05 |
| Acrolein                      | 0.07 ± 0.06 | 0.05 ± 0.04 | 0.03 ± 0.02 |
| 2-Butanone                    | 0.03 ± 0.02 | 0.03 ± 0.02 | 0.04 ± 0.02 |
| Butyraldehyde                 | 0.03 ± 0.02 | 0.03 ± 0.02 | 0.04 ± 0.02 |
| 2-Methylacrylaldehyde         | 0.03 ± 0.05 | 0.03 ± 0.04 | 0.01 ± 0.02 |
| Methyl tert-butyl ether       | 0.22 ± 0.33 | 0.14 ± 0.16 | 0.07 ± 0.12 |
| 3-Pentanone                   | 0.02 ± 0.01 | 0.01 ± 0.01 | 0.01 ± 0.01 |
| Valeraldehyde                 | 0.03 ± 0.02 | 0.03 ± 0.01 | 0.02 ± 0.02 |
| 2-Pentanone                   | 0.02 ± 0.01 | 0.01 ± 0.01 | 0.02 ± 0.01 |
| Benzyl chloride               | 0.00 ± 0.01 | 0.00 ± 0.00 | 0.00 ± 0.00 |
| Hexanal                       | 0.37 ± 0.37 | 0.24 ± 0.27 | 0.32 ± 0.35 |
| Methyl vinyl ketone(butenone) | 0.05 ± 0.06 | 0.03 ± 0.05 | 0.02 ± 0.02 |
| <b>halohydrocarbons</b>       |             |             |             |
| Chloromethane                 | 1.24 ± 0.81 | 0.64 ± 0.30 | 0.80 ± 0.25 |

|                            |             |             |             |
|----------------------------|-------------|-------------|-------------|
| Dichloromethane            | 1.16 ± 1.34 | 1.27 ± 1.11 | 0.57 ± 0.46 |
| Chloroform                 | 0.13 ± 0.17 | 0.11 ± 0.08 | 0.06 ± 0.03 |
| Carbon tetrachloride       | 0.12 ± 0.03 | 0.10 ± 0.02 | 0.13 ± 0.02 |
| Bromomethane               | 0.03 ± 0.04 | 0.02 ± 0.02 | 0.02 ± 0.01 |
| Bromoform                  | 0.01 ± 0.01 | 0.01 ± 0.01 | 0.00 ± 0.01 |
| Monobromodichloromethane   | 0.00 ± 0.00 | 0.00 ± 0.00 | 0.00 ± 0.00 |
| Trichloromonofluoromethane | 0.53 ± 0.16 | 0.80 ± 0.88 | 0.58 ± 0.21 |
| Chloroethane               | 0.05 ± 0.11 | 0.05 ± 0.10 | 0.02 ± 0.03 |
| 1,1-Dichloroethane         | 0.01 ± 0.01 | 0.01 ± 0.01 | 0.00 ± 0.01 |
| 1,2-Dichloroethane         | 0.41 ± 0.39 | 0.34 ± 0.29 | 0.20 ± 0.15 |
| 1,1,1-Trichloroethane      | 0.00 ± 0.00 | 0.00 ± 0.00 | 0.00 ± 0.00 |
| 1,1,2-Trichloroethane      | 0.03 ± 0.03 | 0.02 ± 0.02 | 0.01 ± 0.01 |
| 1,1,2,2-Tetrachloroethane  | 0.00 ± 0.01 | 0.00 ± 0.00 | 0.00 ± 0.00 |
| 1,2-dibromoethane          | 0.00 ± 0.00 | 0.00 ± 0.00 | 0.00 ± 0.00 |
| Dichlorotetrafluoroethane  | 0.02 ± 0.01 | 0.02 ± 0.01 | 0.02 ± 0.00 |
| Trichlorotrifluoroethane   | 0.10 ± 0.02 | 0.07 ± 0.02 | 0.07 ± 0.00 |
| Vinyl chloride             | 0.02 ± 0.04 | 0.01 ± 0.04 | 0.00 ± 0.01 |
| 1,1-Dichloroethylene       | 0.00 ± 0.01 | 0.00 ± 0.01 | 0.00 ± 0.00 |
| cis-1,2-dichloroethylene   | 0.00 ± 0.00 | 0.00 ± 0.00 | 0.00 ± 0.00 |
| Trichloroethylene          | 0.04 ± 0.07 | 0.03 ± 0.05 | 0.01 ± 0.01 |
| Tetrachloroethylene        | 0.04 ± 0.04 | 0.04 ± 0.04 | 0.02 ± 0.02 |
| 1,2-Dichloropropane        | 0.06 ± 0.06 | 0.10 ± 0.11 | 0.05 ± 0.06 |
| cis-1,3-dichloropropene    | 0.00 ± 0.00 | 0.00 ± 0.00 | 0.00 ± 0.00 |
| trans-1,3-dichloropropene  | 0.00 ± 0.00 | 0.00 ± 0.00 | 0.00 ± 0.00 |
| Chlorobenzene              | 0.02 ± 0.02 | 0.01 ± 0.03 | 0.00 ± 0.01 |
| 1,2-Dichlorobenzene        | 0.01 ± 0.01 | 0.01 ± 0.01 | 0.00 ± 0.00 |
| 1,3-Dichlorobenzene        | 0.00 ± 0.01 | 0.00 ± 0.01 | 0.00 ± 0.00 |
| 1,4-Dichlorobenzene        | 0.04 ± 0.05 | 0.04 ± 0.04 | 0.02 ± 0.03 |
| Iodomethane                | 0.00 ± 0.00 | 0.00 ± 0.00 | 0.00 ± 0.00 |
| Acetonitrile               | 0.10 ± 0.10 | 0.13 ± 0.10 | 0.14 ± 0.08 |

90

91

92

93

### References:

- 94 Kurucz, R. L.: Solar Flux Atlas from 296 to 1300 nm, National Solar Observatory Atlas, 1,  
95 <https://doi.org/10.1017/S0074180900035427>, 1984.
- 96 Meller, R. and Moortgat, G. K.: Temperature dependence of the absorption cross sections of formaldehyde  
97 between 223 and 323 K in the wavelength range 225-375 nm, Journal of Geophysical Research:  
98 Atmospheres, 105, 7089-7101, <https://doi.org/10.1029/1999JD901074>, 2000.
- 99 Stutz, J., Kim, E., Platt, U., Bruno, P., Perrino, C., and Febo, A.: UV - visible absorption cross sections of  
100 nitrous acid, Journal of Geophysical Research: Atmospheres, 105, 14585-14592,  
101 <https://doi.org/10.1029/2000JD900003>, 2000.
- 102 Vandaele, A. C., Hermans, C., and Fally, S.: Fourier transform measurements of SO<sub>2</sub> absorption cross  
103 sections: II.: Temperature dependence in the 29000-44000 cm<sup>-1</sup> (227-345 nm) region, Journal of  
104 Quantitative Spectroscopy and Radiative Transfer, 110, 2115-2126,  
105 <https://doi.org/10.1016/j.jqsrt.2009.05.006>, 2009.
- 106 Voight, S., Orphal, J., and Burrows, J.: The temperature and pressure dependence of the absorption cross-  
107 sections of NO<sub>2</sub> in the 250-800 nm region measured by Fourier-transform spectroscopy, Journal of

108 Photochemistry and Photobiology A: Chemistry, 149, 1-7, [https://doi.org/10.1016/s1010-6030\(01\)00650-5](https://doi.org/10.1016/s1010-6030(01)00650-5),  
109 2002.  
110 Voigt, S., Orphal, J., Bogumil, K., and Burrows, J.: The temperature dependence (203-293 K) of the  
111 absorption cross sections of O<sub>3</sub> in the 230-850 nm region measured by Fourier-transform spectroscopy,  
112 Journal of Photochemistry and Photobiology A: Chemistry, 143, 1-9, [https://doi.org/10.1016/S1010-](https://doi.org/10.1016/S1010-6030(01)00480-4)  
113 [6030\(01\)00480-4](https://doi.org/10.1016/S1010-6030(01)00480-4), 2001.  
114
